# Supplementary material for: Influence of fine particulate matter and its pure particulate fractions on pulmonary immune cells and cytokines in mice
Source: PubMed Central journal article supplement — Exp Ther Med. 2021 Apr 21;21(6):662. doi: 10.3892/etm.2021.10094 (PMC8097186; doi:10.3892/etm.2021.10094), 2021-04-21
Supplement: Supplementary_Data.pdf [file Supplementary_Data.pdf]

Figure S1. Pulmonary immune cell numbers counted by flow cytometry following exposure to OPP<sub>2.5</sub> particles (80 μg), PPP<sub>2.5</sub> particles (80 μg) or vehicle (50 μl sterile saline). Percentage and absolute number of (A) IM2, (B) IM3 and (C) eosinophil cells in CD45<sup>+</sup> cells. The circles represent the corresponding data of each mouse in the control group, the squares represent the corresponding data of each mouse in the OPP<sub>2.5</sub> group, and the triangles represent the corresponding data of each mouse in the PPP<sub>2.5</sub> group. Data are presented as mean ± standard error of the mean (n=4/group). \*\*P<0.01 vs. control. OPP<sub>2.5</sub>, original atmospheric particulate matter with a diameter ≤2.5 μm; PPP<sub>2.5</sub>, pure atmospheric particulate matter with a diameter ≤2.5 μm; IM, interstitial macrophage; CD, cluster of differentiation.

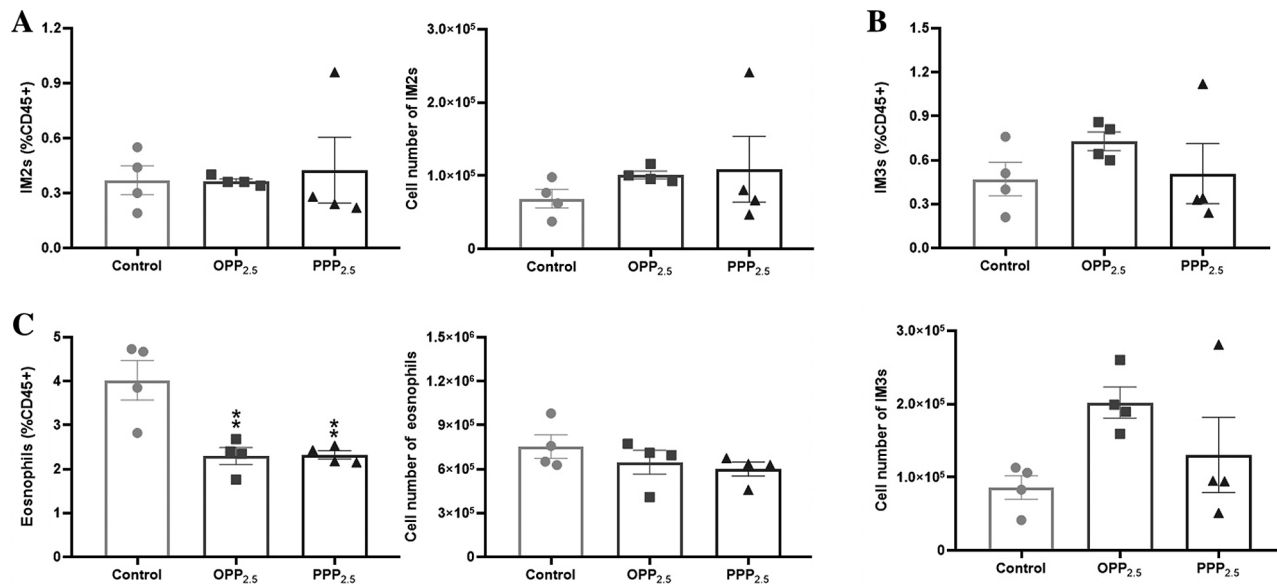

Table SI. Immunophenotyping antibodies.

| Antibody                       | Clone       | Dilutions | Conjugate | Company       | Catalog no. |
|--------------------------------|-------------|-----------|-----------|---------------|-------------|
| F4/80                          | CI:A3-1     | 0.5       | FITC      | Bio-Rad       | MCA497FT    |
| CD45                           | 30-F11      | 0.2       | BV395     | BD Bioscience | 564279      |
| Ly6G                           | 1A8         | 0.3       | BV650     | Biolegend     | 127641      |
| CD11b                          | M1/70       | 0.5       | BV605     | Biolegend     | 101237      |
| CD64                           | X54-5/7.1   | 0.5       | APC       | Biolegend     | 139305      |
| I-A/I-E (MHC II)               | M5/114.15.2 | 0.15      | APC-Cy7   | Biolegend     | 107628      |
| MerTK                          | DS5MMER     | 1         | PE-Cy7    | eBioscience   | 25-5751-80  |
| CD11c                          | N418        | 0.3       | PE        | Biolegend     | 117308      |
| Zombie Aqua™ Fixable Viability |             | 0.08      | BV510     | Biolegend     | 423102      |
